# Supplementary material for: Design of a CrZrOx–Cu2MnOx@Na2WO4 catalyst–oxygen carrier system for efficient chemical looping oxidative dehydrogenation of propane
Source: Royal Society of Chemistry journal article supplement (doi:10.1039/d4dt03391d), 2025-01-01
Supplement: d4dt03391d1.pdf [file d4dt03391d1.pdf]

## Supporting Information

### **Design of CrZrO<sub>x</sub> - Cu<sub>2</sub>MnO<sub>x</sub>@Na<sub>2</sub>WO<sub>4</sub> Catalyst-Oxygen Carrier System for Efficient Chemical Looping Oxidative Dehydrogenation of Propane**

Ziyang Liu<sup>1</sup>, Peng Bai<sup>1\*</sup>, Benjing Xu<sup>1</sup>, Pingping Wu<sup>1</sup>, Hao Wu<sup>1</sup>, Haoran Sun<sup>1</sup>, Junji Li<sup>1</sup>,  
Zifeng Yan<sup>1\*</sup>

<sup>1</sup> State Key Laboratory of Heavy Oil Processing, College of Chemistry and Chemical  
Engineering, China University of Petroleum (East China), Qingdao, 266580, China

\*Corresponding Author. Fax: +86-532-8698-1812 (P. Bai), +86-532-8698-1296 (Z.  
Yan); E-mail: baipeng@upc.edu.cn (P. Bai), zfyancat@upc.edu.cn (Z. Yan).

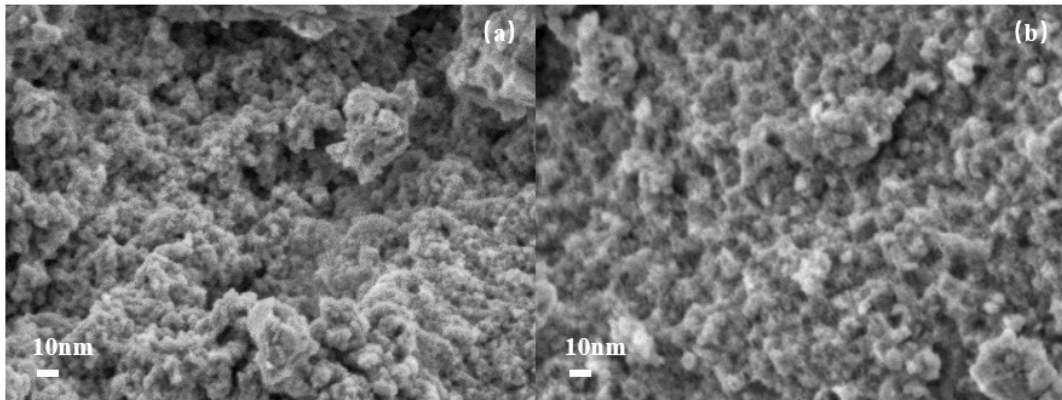

Figure S1. SEM images of sample CZ-10 (a) and CZ-20 (b)

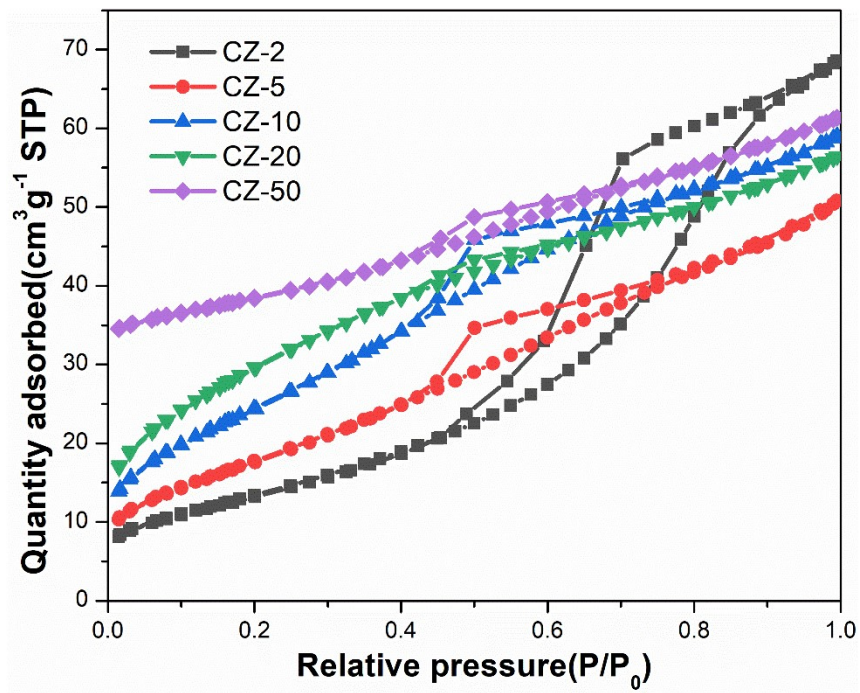

Figure S2. Isotherm linear plots of CrZrOx series catalysts

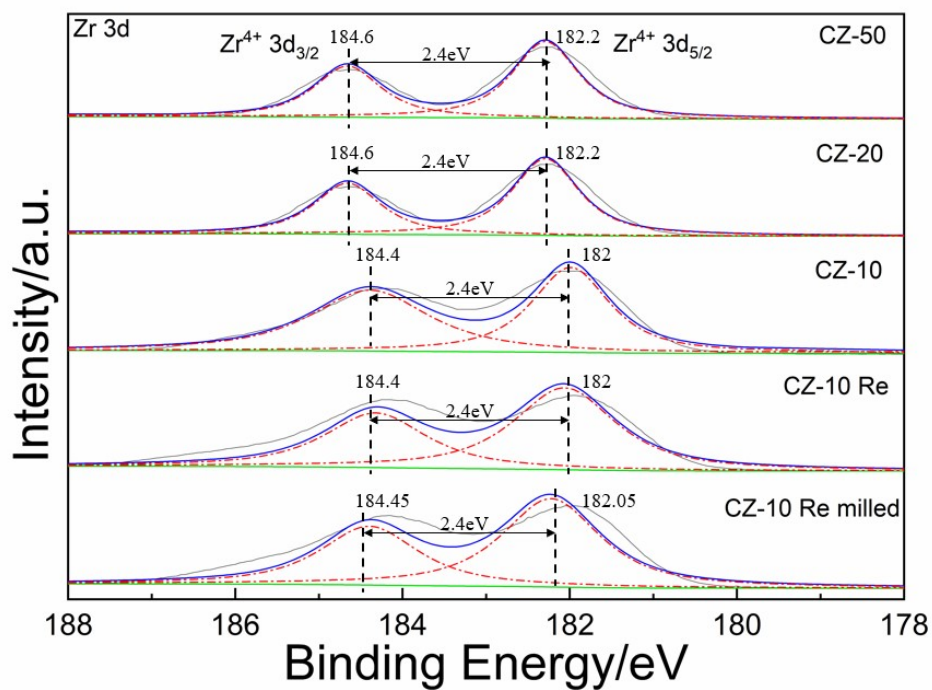

Figure S3. Zr 3d XPS spectra of sample: from top to bottom, CZ-50 and CZ-20 and CZ-10 samples are in oxidation state; (CZ-10 Re) stand for sample in reduction state; (CZ-10 Re milled) stands for CZ-10 Re sample milled with exposed internal surface

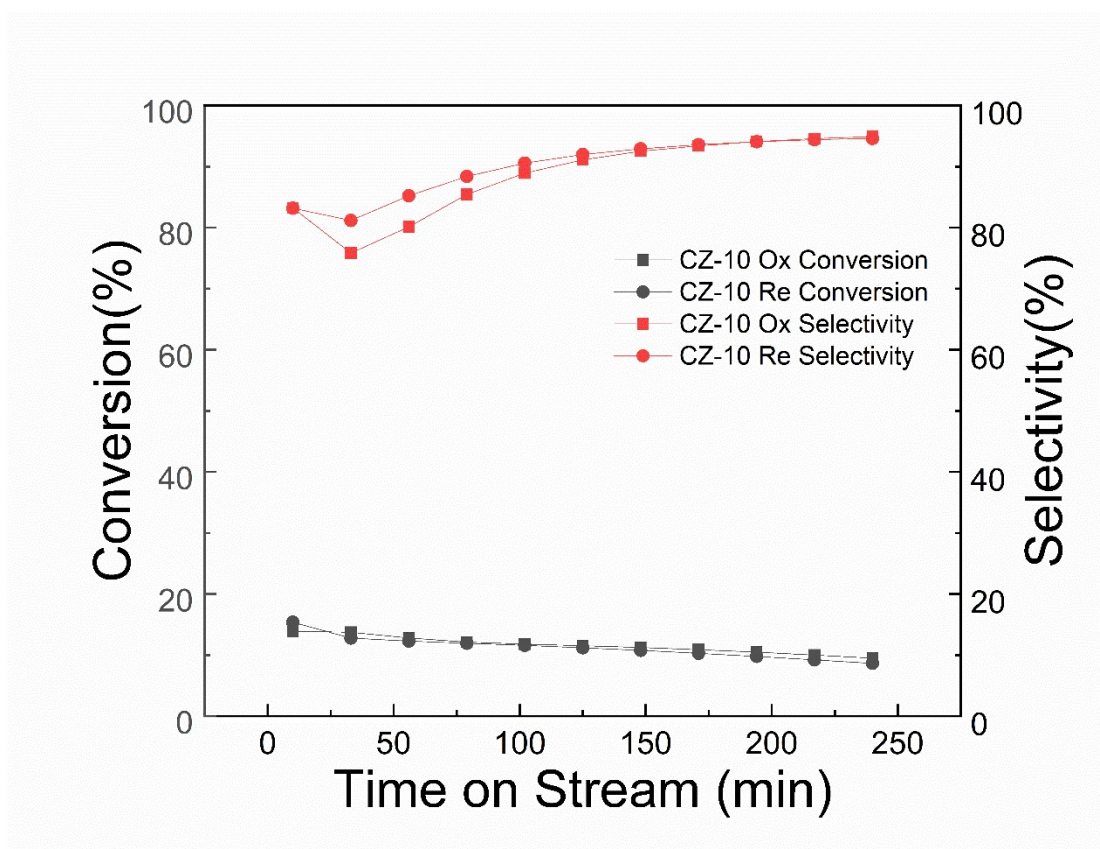

**Figure S4. Conversion and selectivity of CZ-10 in oxidation and reduction State, (Reaction conditions: pure C<sub>3</sub>H<sub>8</sub> feed, 550 °C, atmospheric pressure, WHSV=2.94 h<sup>-1</sup>)**

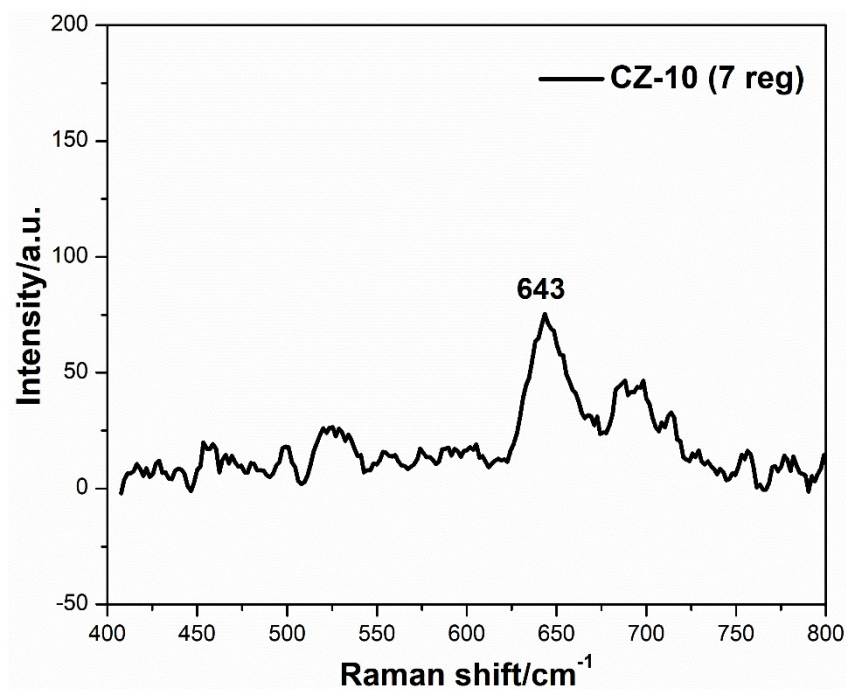

Figure S5. Raman spectrum of CZ-10 (7 reg) sample.

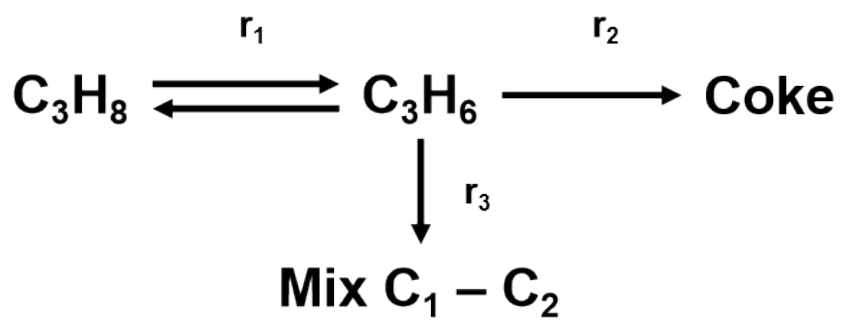

Figure S6. Reaction mechanism from propane to various products

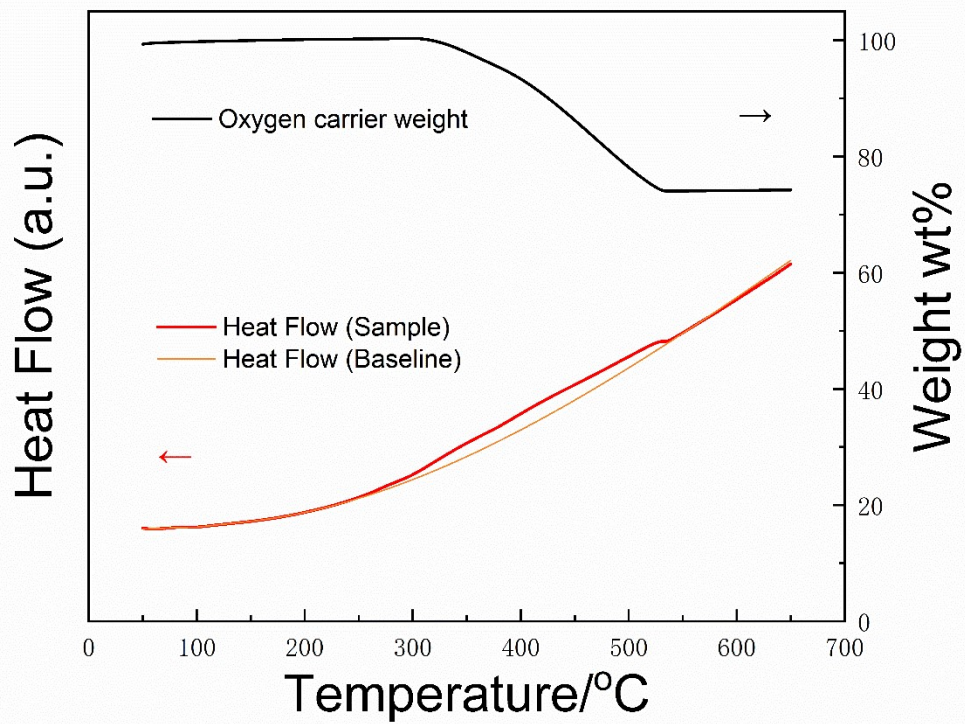

Figure S7. TG curve of oxygen carrier in 5% $H_2$ /Ar flow

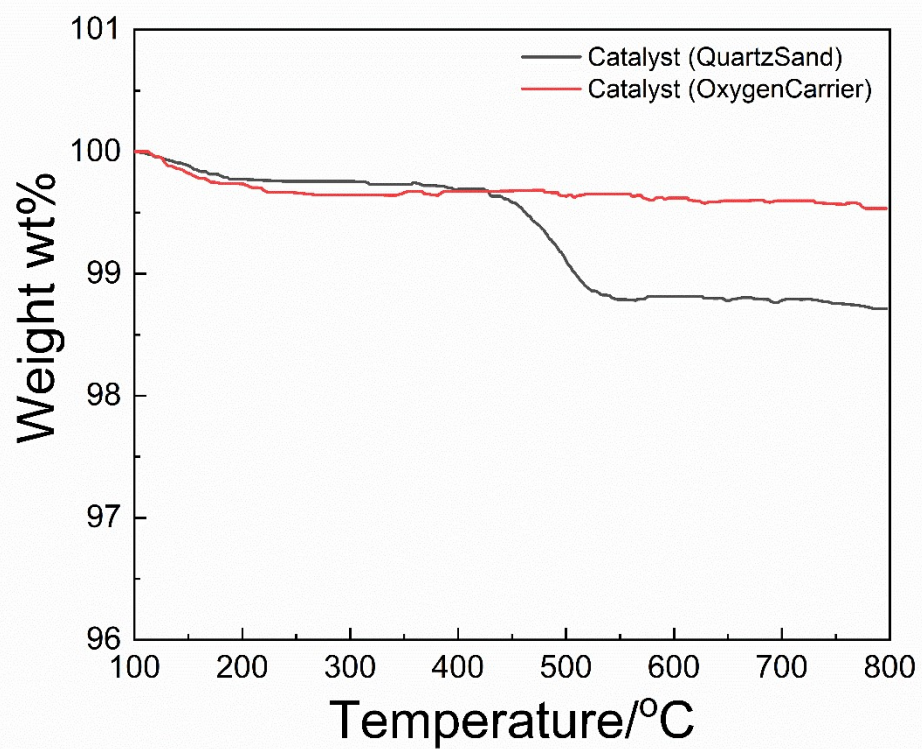

Figure S8. TG curves of deactivated CZ-10 weight loss in air with quartz and oxygen carrier

**Table S1. Textural properties of CrZrO<sub>x</sub> samples**

| Sample | BET surface area<br>(m <sup>2</sup> /g) | Pore volume (cm <sup>3</sup> /g) | Mean pore diameter (nm) |
|--------|-----------------------------------------|----------------------------------|-------------------------|
| CZ-2   | 50                                      | 0.1                              | 6                       |
| CZ-5   | 67                                      | 0.07                             | 4                       |
| CZ-10  | 92                                      | 0.08                             | 3                       |
| CZ-20  | 108                                     | 0.07                             | 3                       |
| CZ-50  | 34                                      | 0.05                             | 4                       |

**Table S2. Weight gained in CaCl<sub>2</sub> tube due to water generated in CL-ODH reaction**

| Reaction | Weight /g<br>(before reaction) | Weight /g<br>(after reaction) | Weight /g<br>(water generated in CL-ODH) |
|----------|--------------------------------|-------------------------------|------------------------------------------|
| Fresh    | 101.317                        | 101.387                       | 0.070                                    |
| 1        | 101.403                        | 101.473                       | 0.070                                    |
| 2        | 101.490                        | 101.563                       | 0.073                                    |
| 3        | 101.579                        | 101.652                       | 0.072                                    |
| 4        | 101.668                        | 101.734                       | 0.066                                    |
| 5        | 101.751                        | 101.822                       | 0.071                                    |
| 6        | 101.838                        | 101.912                       | 0.074                                    |

**Table S3. Operation parameters of CATOFIN process and this work**

| Operation parameters           | CATOFI<br>N | This work |
|--------------------------------|-------------|-----------|
| Catalyst amount                | 100t        | 0.7g      |
| Feed flowrate*                 | 30t/hr      | 10ml/min  |
| WHSV                           | 0.3         | 1.68      |
| Inlet temperature(°C)          | ~650        | 580       |
| Outlet Temperature(°C)         | ~530        | 580       |
| Average temperature(°C)        | ~590        | 580       |
| Absolute Pressure**            | 0.3-0.5bar  | 1 bar     |
| Propane per-pass<br>Conversion | >50%        | Max 35.9% |
| Propylene Selectivity          | >89%        | Max 88.6% |

\* Due to mass flow meter accuracy limit, set the flow rate with minimum 10ml/min.

\*\* It is a high risk to operate this reaction with negative pressure in lab condition.
